# Supplementary material for: Prognostic Value of High-Sensitivity C-Reactive Protein in In-Stent Restenosis: A Meta-Analysis of Clinical Trials
Source: MDPI journal article supplement (doi:10.3390/jcdd9080247), 2022-08-04
Supplement: s1 [file s1]

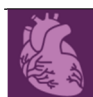

## Supplement Figures

### Figure legends

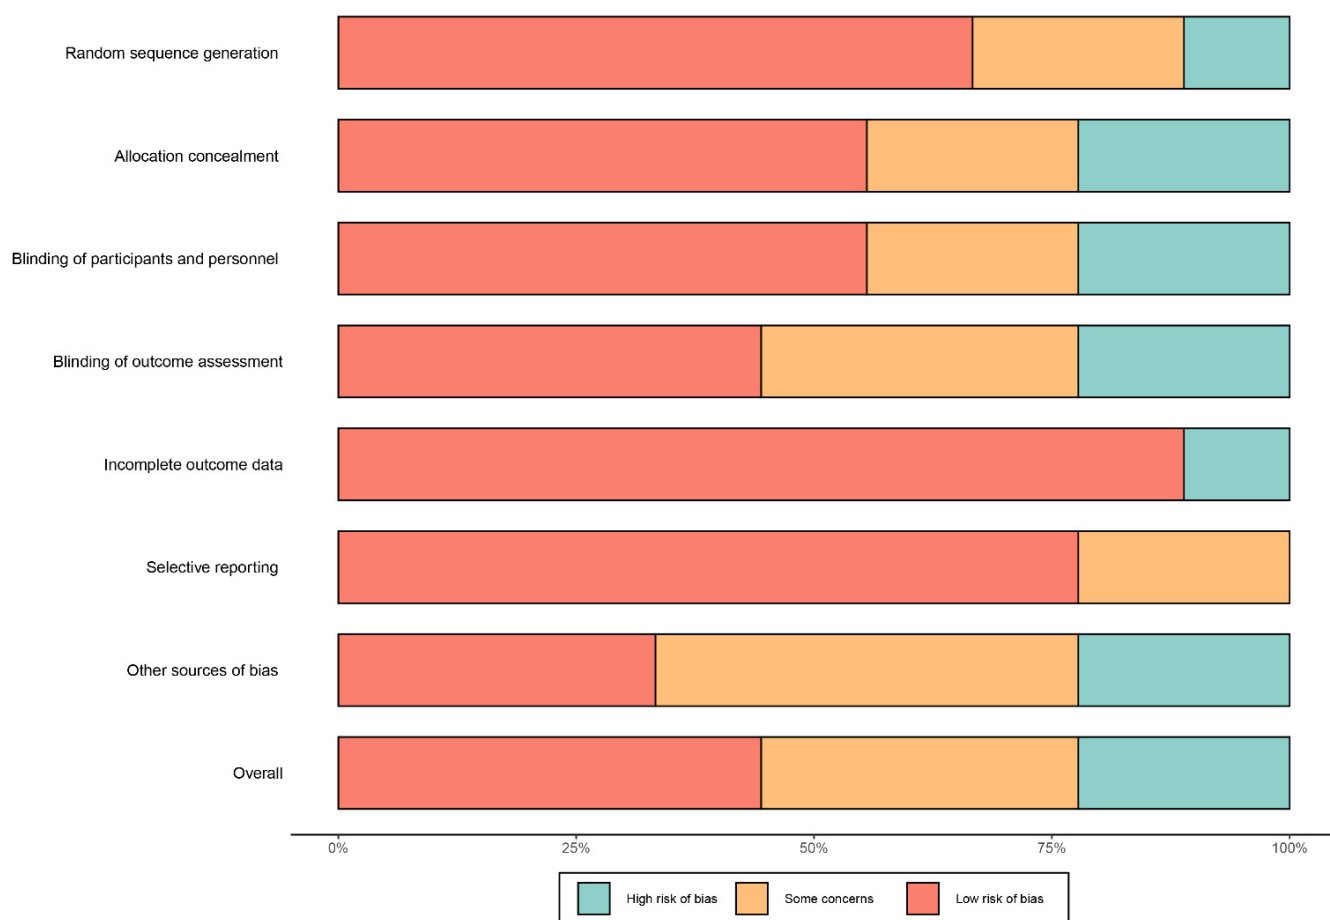

**Supplementary Figure S1** Risk of bias and applicability concerns: reviewers' judgments about each domain presented as percentages across included studies.

|       |         | Risk of bias domains |    |    |    |    |    |    |         |
|-------|---------|----------------------|----|----|----|----|----|----|---------|
|       |         | D1                   | D2 | D3 | D4 | D5 | D6 | D7 | Overall |
| Study | Study 1 |                      |    |    |    |    |    |    |         |
|       | Study 2 |                      |    |    |    |    |    |    |         |
|       | Study 3 |                      |    |    |    |    |    |    |         |
|       | Study 4 |                      |    |    |    |    |    |    |         |
|       | Study 5 |                      |    |    |    |    |    |    |         |
|       | Study 6 |                      |    |    |    |    |    |    |         |
|       | Study 7 |                      |    |    |    |    |    |    |         |
|       | Study 8 |                      |    |    |    |    |    |    |         |
|       | Study 9 |                      |    |    |    |    |    |    |         |

D1: Random sequence generation  
D2: Allocation concealment  
D3: Blinding of participants and personnel  
D4: Blinding of outcome assessment  
D5: Incomplete outcome data  
D6: Selective reporting  
D7: Other sources of bias

Judgement  
 Low  
 Unclear  
 High  
 Critical

**Supplementary Figure S2** Risk of bias and applicability concerns: reviewers' judgments about each domain for each included study.

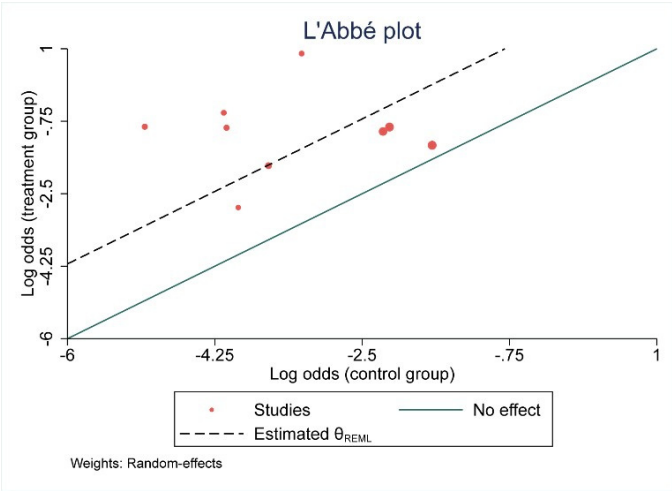

**Supplementary Figure S3** L'Abbéplot for current meta -analysis.

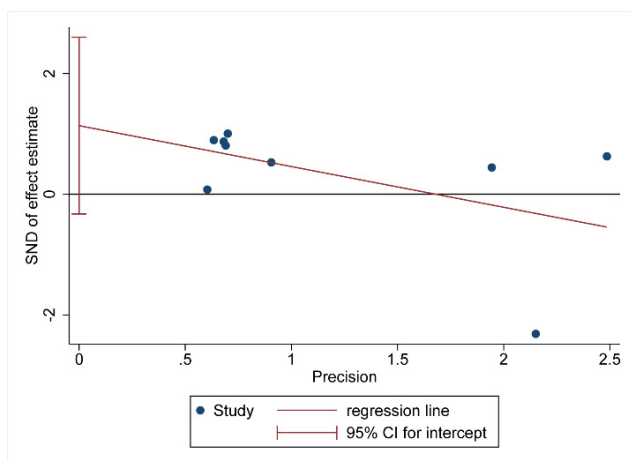

**Supplementary Figure S4** Egger's plot of current meta-analysis.
